# Supplementary material for: A randomised controlled trial of a complex intervention to reduce children’s exposure to secondhand smoke in the home
Source: Tob Control. 2017 Apr 21;27(2):155–62. doi: 10.1136/tobaccocontrol-2016-053279 (PMC5870442; doi:10.1136/tobaccocontrol-2016-053279)
Supplement: Supplementary table 1 [file tobaccocontrol-2016-053279supp001.docx]

*Supplementary Table 1: Primary and Sensitivity Analysis: Changes between Baseline and Week Twelve for 16-to-24-hour Log Transformed Average PM2.5 (average PM2.5 in levels in squared brackets)*

|  | Intervention | | Usual Care | | Mean Difference | | | |
| --- | --- | --- | --- | --- | --- | --- | --- | --- |
|  | Baseline  (SD) | Week 12  (SD) | Baseline  (SD) | Week 12  (SD) | Basic*  (95% CI) | P Value | Adjusted†  (95% CI) | P Value |
| **Primary Outcome Analysis** | | | | | | | | |
| Multiple Imputation‡ | 3.4 (1.1)  [54.2] | 2.9 (1.0)  [30.7] | 3.4 (1.1)  [48.7] | 3.3 (1.2)  [47.6] | -0.45  (-0.75 to -0.16) | 0.003 | -0.45  (-0.75 to -0.16) | 0.003 |
| No. households | 102 | 102 | 102 | 102 | 204 |  | 204 |  |
| **Sensitivity Analysis** | | | | | | | | |
| Complete Case | 3.4 (1.1)  [54.6] | 2.8 (1.0)  [28.9] | 3.3 (1.0)  [46.5] | 3.3 (1.1)  [49.8] | -0.39  (-0.66 to -0.13) | 0.004 | -0.39  (-0.66 to -0.13) | 0.004 |
| No. households | 101 | 91 | 95 | 87 | 172 |  | 172 |  |
|  |  |  |  |  |  |  |  |  |
| Last Observation Carried Forward | 3.4 (1.1)  [54.6] | 2.9 (1.0)  [33.1] | 3.3 (1.0)  [46.5] | 3.3 (1.1)  [49.0] | -0.32  (-0.56 to -0.08) | 0.01 | -0.32  (-0.56 to -0.08) | 0.01 |
| No. households | 101 | 102 | 95 | 100 | 196 |  | 196 |  |
|  |  |  |  |  |  |  |  |  |
| Mixed Model§ | 3.4 (1.1)  [54.6] | 2.8 (1.0)  [28.9] | 3.3 (1.0)  [46.5] | 3.3 (1.1)  [49.8] | -0.43  (-0.73 to -0.14) | 0.004 | -0.30  (-0.60 to 0.00) | 0.05 |
| No. households | 101 | 91 | 95 | 87 | 202 |  | 202 |  |
|  |  |  |  |  |  |  |  |  |
| Excluding households with affected data due to calibration error‖ | 3.4 (0.9)  [55.9] | 3.0 (0.9)  [33.4] | 3.4 (1.0)  [51.5] | 3.3 (1.0)  [47.9] | -0.40  (-0.72 to -0.09) | 0.01 | -0.40  (-0.71 to -0.09) | 0.01 |
| No. households | 86 | 86 | 91 | 91 | 177 |  | 177 |  |
|  |  |  |  |  |  |  |  |  |
| Average PM2.5 paired for each participating household‖ | 3.4 (1.0)  [53.6] | 2.8 (1.0)  [30.7] | 3.3 (1.0)  [48.7] | 3.2 (1.0)  [42.9] | -0.40  (-0.72 to -0.09) | 0.01 | -0.41  (-0.72 to -0.09) | 0.01 |
| Average PM2.5 paired for all participating households‖ | 3.5 (1.0)  [67.9] | 3.0 (1.0)  [37.2] | 3.5 (1.0)  [60.7] | 3.4 (2.0)  [57.8] | -0.38  (-0.80 to 0.05) | 0.08 | -0.37  (-0.81 to 0.06) | 0.09 |
| No. households | 102 | 102 | 102 | 102 | 204 |  | 204 |  |

* Basic refers to adjusted only for baseline log transformed average PM2.5.

† Adjusted for baseline log transformed average PM2.5, as well as for season at week twelve, deprivation index and having a partner who smokes.

‡ Imputing five datasets

§ In the mixed method model the effectiveness measure is the coefficient associated to the interaction between Intervention Group and Week Twelve Visit.

‖ Using multiple imputation model (imputing five datasets).
