# Supplementary material for: A randomised controlled trial of a complex intervention to reduce children’s exposure to secondhand smoke in the home
Source: Tob Control. 2017 Apr 21;27(2):155–62. doi: 10.1136/tobaccocontrol-2016-053279 (PMC5870442; doi:10.1136/tobaccocontrol-2016-053279)
Supplement: Supplementary table 2 [file tobaccocontrol-2016-053279supp002.docx]

*Supplementary Table 2: Secondary Outcome Measures: air quality, smoking & quitting behaviour* (natural values of transformed variables in squared brackets)*

|  | **Intervention** | | **Usual Care** | | **Mean Difference (95% CI)** | | | |
| --- | --- | --- | --- | --- | --- | --- | --- | --- |
|  | Baseline  (SD) | Week 12  (SD) | Baseline  (SD) | Week 12  (SD) | Basic†  (95% CI) | P Value | Adjusted‡  (95% CI) | P Value |
| No. Households | 101 | 91 | 95 | 87 | 172 |  | 172 |  |
| Ln(max. PM2.5§) | 5.4 (1.2)  [441.6] | 4.9 (1.4)  [463.1] | 5.4 (1.1)  [401.7] | 5.3 (1.2)  [359.3] | -0.31  (-0.67 to 0.04) | 0.09 | -0.32  (-0.67 to 0.04) | 0.08 |
| Proportion of time spent over 25 µm/m3§ | 0.4 (0.3) | 0.2 (0.3) | 0.3 (0.3) | 0.3 (0.3) | -0.12  (-0.20 to -0.05) | 0.001 | -0.12  (-0.19 to -0.05) | 0.001 |
|  |  |  |  |  |  |  |  |  |
| No. Households | 64 | 57 | 66 | 63 | 96 |  | 96 |  |
| Ln(Cotinine levels) | 1.6 (0.9)  [7.5] | 1.4 (0.9)  [6.5] | 1.6 (0.9)  [7.6] | 1.6 (1.0)  [8.1] | -0.26  (-0.58 to 0.05) | 0.10 | -0.32  (-0.64 to 0.01) | 0.04 |
|  |  |  |  |  |  |  |  |  |
| No. Households | 102 | 52 | 102 | 76 | 128 |  | 128 |  |
| Ln(No. of cigarettes smoked daily at home) | 2.4 (0.8)  [15.1] | 1.6 (1.0)  [7.3] | 2.4 (0.8)  [15.0] | 2.3 (1.0)  [13.4] | -0.77  (-1.08 to -0.47) | 0.000 | -0.77  (-1.07 to -0.46) | 0.000 |
|  |  |  |  |  |  |  |  |  |
| No. Households | 102 | 87 | 102 | 88 | 175 |  | 175 |  |
| Heaviness of Smoking Index | 2.6 (1.5) | 1.8 (1.5) | 2.5 (1.6) | 2.2 (1.6) | -0.50  (-0.80 to -0.19) | 0.001 | -0.50  (-0.81 to -0.20) | 0.001 |
|  |  |  |  |  |  |  |  |  |
|  | **Intervention** | | **Usual Care** | | **OR (95% CI)** | | | |
|  | Baseline | Week 12 | Baseline | Week 12 | Basic† | P Value | Adjusted‡ | P Value |
| No. Households | 102 | 95 | 102 | 93 | 188 |  | 188 |  |
| Seriously planning to quit smoking | 77  (75.5%) | 70  (73.7%) | 81  (79.4%) | 74  (79.6%) | 0.72  (0.36 to 1.42) | 0.34 | 0.72  (0.36 to1.42) | 0.36 |
|  |  |  |  |  |  |  |  |  |
| No. Households | 93 | 95 | 95 | 93 | 188 |  | 188 |  |
| Has attempted to quit during the study‖ | 19  (20.4%) | 20  (21.1%) | 5  (5.3%) | 7  (7.5%) | 3.28  (1.31 to 8.20) | 0.01 | 3.25  (1.30 to 8.11) | 0.01 |
|  |  |  |  |  |  |  |  |  |
| No. Households | 93 | 95 | 95 | 93 | 188 |  | 188 |  |
| Has quit smoking during the study‖ | 5  (5.4%) | 8  (8.4%) | 3  (3.2%) | 4  (4.3%) | 2.05  (0.59 to 7.07) | 0.26 | 2.04  (0.56 to 7.42) | 0.28 |

* Mean and SD reported for baseline and week twelve mean differences and number and percentage –no. (%) –reported for baseline odds ratios

† Basic refers to adjusted by baseline for mean differences and just group difference for odds ratio

‡ Adjusted refers to basic model adjusted by season at week twelve, deprivation index and having a partner who smokes.

§ Computed for those participants with 16 to 24 hours of PM2.5 measurements.

‖ Measured at week seven and week twelve, hence comparison is between these two times.
